# Supplementary material for: Oral Squamous Cell Carcinoma Contributes to Differentiation of Monocyte-Derived Tumor-Associated Macrophages via PAI-1 and IL-8 Production
Source: MDPI journal article supplement (doi:10.3390/ijms22179475), 2021-08-31
Supplement: s1 [file ijms-1331942-supplementary.pdf › ijms-1331942-supplementary.pdf]

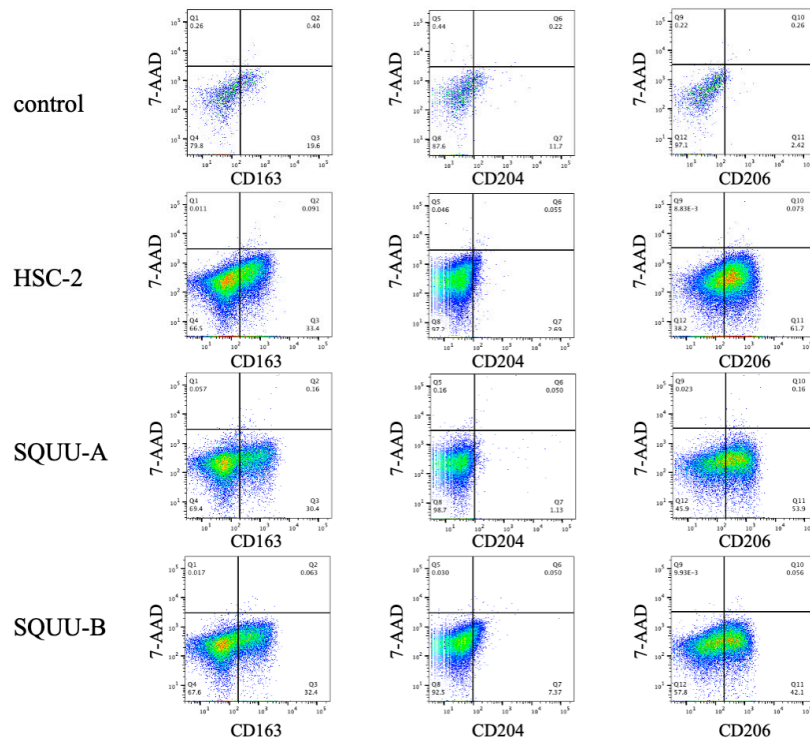

**Supplementary Figure S1:** Representative image for the co-culture of 7-AAD<sup>+</sup>TAM subsets co-cultured with OSCC cell lines (HSC-2, SQUU-A, and SQUU-B cells) for 4 days. The detailed methods for cultivating cells are described in the Materials and Methods section

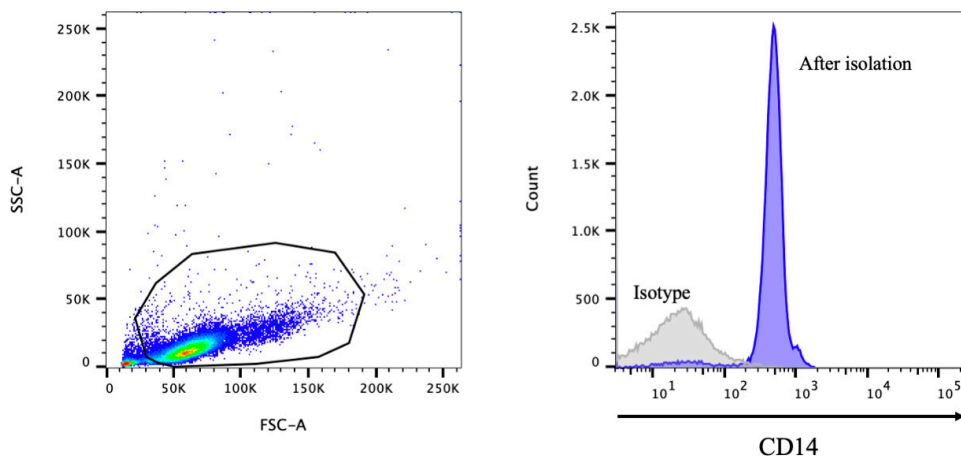

**Supplementary Figure S2:** Purity of the isolated CD 14<sup>+</sup> cells were as determined by flow cytometric analysis. The detailed methods for isolating cells are described in the Materials and Methods section.

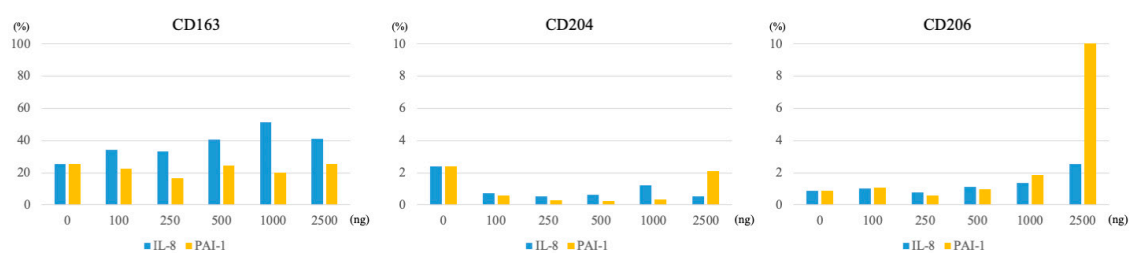

**Supplementary Figure S3:** Positive rate of CD163, CD204, and CD206 in CD14<sup>+</sup> monocytes stimulated with IL-8 or PAI-1, as determined by flow cytometric analysis.
